# Supplementary material for: Dietary Restriction during Development Enlarges Intestinal and Hypodermal Lipid Droplets in Caenorhabditis elegans
Source: PLoS One. 2012 Nov 20;7(11):e46198. doi: 10.1371/journal.pone.0046198 (PMC3502458; doi:10.1371/journal.pone.0046198)
Supplement: Table S2 — Volume of the maximum-sized lipid droplets under ad libitum (AL) and dDR condition. (DOC) [file pone.0046198.s009.doc]

**Supporting information – Table S2**

**Table S2. Surface to volume ratio of lipid droplets under *ad libitum* (AL) and dDR condition**

|  | **AL** | | **dDR 1.5** | | **dDR 0.7** | |
| --- | --- | --- | --- | --- | --- | --- |
| **stage** | pharynx | tail | pharynx | tail | pharynx | tail |
| **L2** | 4.0 | 4.0 | 3.0 | 2.7 | 3.2 | 2.9 |
| **L4** | 4.0 | 4.1 | 3.2 | 2.8 | 3.0 | 3.1 |
| **adult** | 3.6 | 2.8 | 2.9 | 2.4 | 2.6 | 2.4 |

Dietary restriction (DR1.5, DR0.7) reduces the surface to volume ratio of LDs in comparison to AL condition. The LD surface (µm2) was calculated from the mean LD volume (µm3) of all BODIPY 493/503-labeled droplets in pharynx and tail region of L2 larvae, L4 larvae and adult wild-type animals. The mean LD volumes (± SEM) are illustrated in Figure 12.
