# Supplementary material for: Dietary Restriction during Development Enlarges Intestinal and Hypodermal Lipid Droplets in Caenorhabditis elegans
Source: PLoS One. 2012 Nov 20;7(11):e46198. doi: 10.1371/journal.pone.0046198 (PMC3502458; doi:10.1371/journal.pone.0046198)
Supplement: Table S4 — dDR induced alteration of expression of genes implicated in lipid metabolism and storage in C. elegans. (DOC) [file pone.0046198.s011.doc]

**Supporting information – Table S4**

**Table S4. dDR induced alteration of expression of genes implicated in lipid metabolism and storage in *C. elegans***

|  | **Fold change of regulationb** | | | |
| --- | --- | --- | --- | --- |
| **Descriptiona** | **L4** | | **adult** | |
|  | **dDR1.5** | **dDR0.7** | **dDR1.5** | **dDR0.7** |
| **Lipases** |  |  |  |  |
| *hosl-1* | 1.2 | ns | 1.0/ -1.1 | -1.2/ -1.3 |
| *atgl-1* | 1.7/ 1.4 | 1.4/ 1.6 | ns | -1.3 |
| *fil-1* | ns | ns | 8.4 | 5.7 |
| *fil-2* | ns | ns | ns | ns |
|  |  |  |  |  |
| **Mitochondrial ß-oxidation** |  |  |  |  |
| Mitochondrial acyl-CoA synthetase |  |  |  |  |
| *acs-3* | 1.1 | 1.1 | 1.8 | 2.0 |
| *acs-11* | ns | 1.6 | 2.5 | 2.8 |
| *acs-13* | ns | ns | -1.3 | -1.1 |
| *acs-15* | -1.4 | -1.7 | 1.7 | 3.5 |
| *acs-18* | -1.4 | - 1.7 | 3.1 | 6.3 |
| R09E10.4 | ns | -2.0 | 1.2 | 2.6 |
|  |  |  |  |  |
| Carnitine palmitoyl transferase I |  |  |  |  |
| *cpt-1* | 1.5 | ns | 1.6 | 1.4 |
| *cpt-3* | 7.3 | ns | 25.7 | 13.6 |
| *cpt-4* | ns | -1.7 | -1.7 | ns |
| *cpt-5* | 2.9 | 2.3 | ns | ns |
| *cpt-6* | 1.5 | ns | ns | -1.4 |
| F41E7.6 | -1.7 | ns | -5.0 | -2.5 |
| F09F3.9 | 2.9 | 2.4 | ns | ns |
|  |  |  |  |  |
| Carnitine palmitoyl transferase II |  |  |  |  |
| *cpt-2* | 1.3 | 1.4 | 1.1 | 1.1 |
|  |  |  |  |  |
| Acyl-CoA dehydrogenase |  |  |  |  |
| *acdh-1* | ns | ns | -1.7 | -1.7 |
| *acdh-2* | ns | -1.7 | -11.0 | -17.5 |
| E04F6.5 | 1.2 | ns | ns | ns |
| F28A10.6 | -1.4 | -1.4 | -2.5 | -3.3 |
| K05F1.3 | -1.4 | -1.4 | 3.0 | 5.7 |
| K06A5.6 | ns | ns | -1.3 | -1.3 |
| T25G12.5 | 1.4 | 1.4 | ns | ns |
|  |  |  |  |  |
| Enoyl-CoA hydratase |  |  |  |  |
| *ech-1* | ns | ns | -1.7 | -2.0 |
| *ech-2* | 1.3 | 1.4 | 1.1 | 1.1 |
| *ech-4* | ns | ns | -2.0 | -2.0 |
| *ech-5* | 0.8 | ns | -1.7 | -2.0 |
| *ech-6* | ns | ns | -2.5 | -2.5 |
| *ech-7* | ns | ns | -2.0 | -2.0 |
|  |  |  |  |  |
| Hydroxy-Acyl-CoA dehydrogenase |  |  |  |  |
| *hacd-1* | ns | ns | 2.6 | 3.8 |
| B0272.3 | 1.4 | 1.3 | 1.3 | 1.3 |
| T08B2.7 | ns | 1.1 | 1.1 | 1.0 |
|  |  |  |  |  |
| Thiolase |  |  |  |  |
| F53A2.7 | ns | ns | -1.4 | -1.4 |
| B0303.3 | 1.1 | ns | ns | ns |
|  |  |  |  |  |
| **Peroxisomal ß-oxidation** |  |  |  |  |
|  |  |  |  |  |
| Acyl-CoA   | 267,788 | | --- | | 236,537 | | 172,533 | | 167,017 | | 151,092 | | 528,699 | | 354,993 | | 294,04 | | 214,744 | | 176,464 | | 1669,348 | | 1280,604 | | 472,029 | | 247,064 | | 197,634 | | 503,96 | | 391,865 | | 235,551 | | 224,097 | | 168,566 | | 272,54 | | 244,798 | | 229,918 | | 173,964 | | 148,85 | | 1573,608 | | 769,131 | | 218,089 | | 214,427 | | 133,688 | | 1986,941 | | 329,938 | | 309,883 | | 227,724 | | 85,844 | | 1992,973 | | 668,608 | | 590,533 | | 471,466 | | 368,946 |   synthetase  *acs-1* | -1.25 | -2.0 | -2.5 | 0.3 |
| *acs-1* | -1.3 | -2.0 | -2.5 | -3.3 |
|  |  |  |  |  |
| Acyl-CoA oxidase |  |  |  |  |
| F08A8.1 | 1.6 | 1.6 | 2.1 | 2.2 |
| F08A8.2 | ns | -1.4 | -2.5 | -2.5 |
| F08A8.3 | 0.8 | -1.3 | -5.0 | -10.0 |
| F08A8.4 | ns | -1.4 | -5.0 | 0.3 |
| F59F4.1 | 1.3 | 1.4 | 1.2 | 1.3 |
| C48B4.1 | ns | ns | -3.3 | -5.0 |
| F25C8.1 | ns | ns | ns | ns |
|  |  |  |  |  |
| Enoyl-CoA hydratase |  |  |  |  |
| *ech-3* | 1.2 | 1.4 | 1.3 | 1.2 |
| *ech-8* | 2.2 | 3.0 | 2.2 | 2.0 |
| *ech-9* | ns | -2.0 | ns | -10.0 |
|  |  |  |  |  |
| Hydratase  *maoc-1* | 2.0 | 2.3 | 1.5 | ns |
|  |  |  |  |  |
| Dehydrogenase  *dhs-28* | 1.5 | 1.7 | 1.5 | 1.5 |
|  |  |  |  |  |
| Thiolase |  |  |  |  |
| *daf-22* | 1.8 | 2.1 | 1.4 | 1.4 |
| T02G5.4 | -3.3 | ns | ns | -1.1 |
| T02G5.7 | -1.3 | -1.4 | ns | -1.1 |
| *kat-1* | -1.1 | ns | ns | -2.0 |
|  |  |  |  |  |
| **Lipid synthesis** |  |  |  |  |
| Fatty acid synthase |  |  |  |  |
| W09B6.1 | ns | ns | 1.6 | 1.7 |
|  |  |  |  |  |
| Acetyl-CoA carboxylase |  |  |  |  |
| F32H2.5 | ns | n.s | n.s | 1.2 |
|  |  |  |  |  |
| Fatty acid desaturase |  |  |  |  |
| *fat-1* | 1.3 | ns | 1.4 | 1.6 |
| *fat-2* | 1.3 | ns | 2.9 | 3.5 |
| *fat-3* | 1.9 | 2.5 | 6.8 | 8.2 |
| *fat-4* | 1.1 | ns | 2.2 | 2.4 |
| *fat-6* | 1.2 | 1.2 | 1.6 | 1.8 |
| *fat-7* | 2.8 | 1.9 | ns | -1.9 |
|  |  |  |  |  |
| Fatty acid elongase |  |  |  |  |
| *elo-1* | 1.2 | ns | 1.3 | 1.2 |
| *elo-2* | ns | ns | ns | ns |
| *elo-3* | -1.7 | -1.7 | -1.7 | -2.0 |
| *elo-4* | -1.3 | -1.3 | ns | ns |
| *elo-5* | ns | -1.7 | -3.3 | -2.5 |
| *elo-6* | ns | ns | -2.0 | -1.7 |
| *elo-7* | -1.3 | -1.7 | 3.3 | 7.7 |
| *elo-8* | -1.5 | -1.6 | 3.2 | 6.2 |
| *elo-9* | ns | ns | ns | ns |
|  |  |  |  |  |
| Diacylglycerol-acyltransferase |  |  |  |  |
| F59A1.10 | ns | ns | -3.3 | -2.5 |
| K07B1.4 | ns | ns | ns | -1.1 |
| *dgtr-1* | ns | -1.1 | -1.4 | -1.7 |
|  |  |  |  |  |
| Phosphatidylcholine synthesis |  |  |  |  |
| *sams-1* | ns | ns | -1.3/ 2.0/ -1.7 | -1.4/ 2.2/ -1.9 |
| *pmt-1* | 1.4/ 1.3 | ns | 4.2/ 4.0 | 4.7/ 4.4 |
| *pmt-2* | 1.5 | ns | -1.9 | -2.1 |
| *pcyt-1* | ns | ns | -2.3 | -2.6 |
|  |  |  |  |  |
| **Lipid transport and storage** |  |  |  |  |
| Fatty acid binding protein |  |  |  |  |
| *lbp-1* | 1.5 | 2.0 | 2.0 | 2.0 |
| *lbp-2* | 2.1 | n.s | n.s | ns |
| *lbp-3* | ns | -1.4 | n.s | ns |
| *lbp-4* | ns | ns | -1.4 | -1.4 |
| *lbp-5* | 1.2 | 1.3 | 1.3 | 1.3 |
| *lbp-6* | 1.2 | ns | -1.7 | -1.7 |
| *lbp-7* | 1.2 | ns | 2.2 | 2.6 |
| *lbp-8* | -1.9 | -2.9 | -33.3 | -40.0 |
|  |  |  |  |  |
| Acyl-CoA binding protein |  |  |  |  |
| *acbp-1* | -1.2 | ns | -1.6 | -1.7 |
| *acbp-3* | ns | ns | -2.0 | -2.0 |
| *acbp-4* | -1.4 | -1.7 | 1.6 | 2.6 |
| *acbp-5* | ns | ns | ns | 1.0 |
| *acbp-6* | -1.7 | -1.9 | -2.6 | -2.9 |
|  |  |  |  |  |
| lipoprotein |  |  |  |  |
| *vit-2* | -1.6 | -2.0 | ns | ns |
| *vit-3* | ns | -3.6 | -1.5 | -2.2 |
| *vit-4* | ns | -4.3 | -1.8 | -3.7 |
| *vit-5* | ns | -2.6 | ns | -1.6 |
| *vit-6* | ns | -1.7/ -2.0 | ns | ns |
|  |  |  |  |  |
| *daf-2* (insulin/IGF receptor ortholog) | ns | 1.6/ 1.3 | 1.2/ -1.9 | 1.2/ -2.3 |
| *daf-7* (transforming growth factor) | 1.3 | 1.5 | ns | ns |
|  |  |  |  |  |
| **Putative lipid droplet associated** |  |  |  |  |
| *cav-2* (caveolin-related) | 1.3 | 1.4 | ns | ns |
| *lpin-1* | 1.2 | 1.3 | 1.2 | 1.1 |
|  |  |  |  |  |
| **Transcription factor** |  |  |  |  |
| *klf-3* | ns | ns | ns | ns |
| *sbp-1* | ns | ns | -1.7 | -1.8 |
| *nhr-49* | 1.7/ 1.5 | 1.6/ 1.6 | 1.3/ 1.2 | 1.2/1.2 |
| *nhr-80* | ns | ns | 1.8/ 1.6 | 1.9/ 1.7 |

This table shows the fold changes of mRNA levels of candidate genes expected being involved in lipid metabolism and lipid storage function in response to DR (DR1.5, DR0.7). aDescription of genes is based on the gene ontology (GO) annotation for *C. elegans* (WormBase, www.wormbase.org, release WS 198).

bFold changes are understood between DR and AL group. A positive number indicates a higher gene expression in DR animals. In case of down-regulated genes, the fold change was calculated as 1/ratio, and a minus was added to the quotient. A negative number indicates a lower gene expression under DR. In case of splice variants, fold changes are separated by a slash. Significance threshold was a p-value <0.05. ns, not significant.
